# Supplementary material for: Exploring Well Water Testing Behaviour Through the Health Belief Model
Source: PubMed Central journal article supplement (PMC7077933; doi:10.1177/1178630220910143), 2020-03-11
Supplement: Interview_guide_and_statement_ranking_409aa81a26_xyz266599a5f31e8.pdf [file Interview_guide_and_statement_ranking_409aa81a26_xyz266599a5f31e8.pdf]

## **Interview questions.**

### **Question 1: Tell me about the sources of the drinking water in your home?**

*Probe:* How often do you drink water from your in-house tap?

*Probe:* Tell me about your satisfaction with the look, taste, odour, feel of the water you primarily drink in your homes?

*Probe:* How would you compare the look, taste, odour with other sources of drinking water you may have experienced (e.g. bottled water)?

### **Question 2: What comes to your mind when you hear of well water pollution?**

*Probe:* Do you feel well water pollution is a risk in your area?

*Probe:* Do you think well water pollution is a priority issue with respect to health for example do you think of well water pollution like you would of heart disease or cancer?

*Probe:* What illnesses do you think can be caused by well water pollution?

### **Question 3: Tell me about the current well water management practices that you use to protect your water well from pollution.**

*Probe:* Describe what led you to use these management practices (testing, treatment and other).

*Probe:* Tell me about your beliefs towards these management practices and whether you believe they protect you against illness.

*Probe:* Can you tell me how you test water in your home? How often are you able to test your well water in your home?

### **Question 4: I would like to talk a bit about livestock manure and how it might affect your well water. Do you have any thoughts about that?**

*Probe:* Can you describe any experiences that you may have had or know about with respect to water contamination by livestock manure.

*Probe:* What livestock species are likely to cause pollution in your area?

*Probe:* Is there anything people can do to prevent well water pollution by livestock manure?

*Probe:* How feasible is it to prevent well water pollution by livestock manure in your opinion?

*Probe:* How would you rank livestock as a risk to water contamination relative to other potential sources of well water pollution in your area?

### **Question 5: How likely is your well to get polluted? Or Is your well likely to get polluted?**

*Probe:* What scenarios do you think would increase the likelihood of your well being polluted?

**Question 6: How dangerous (or severe) do you think well water pollution can be? Or How big of a problem do you think well water pollution is?**

*Probe:* Do you know of any well water pollution events in Alberta (Canada)?

*Probe:* Might you be concerned about your family's health from water pollution by livestock?

**Question 7: Can we talk about testing and treating your water and how you go about doing it**

*Probe:* Have there been any problems in getting your water tested? What were they?

*Probe:* Have there been any problems in getting your well water treated (and what were they)?

*Probe:* How might these problems be addressed (or what do you think are the possible solutions to these problems)?

**Question 8: What would help you get your water tested on a regular basis?**

*Probe:* Is there anything the well water testers or government can do to get you to test your well water?

**Question 9: How might you and your family benefit from getting your water tested?**

*Probe:* Might this benefit only your family or others? May you expand on this idea?

Summary table of +/-/n comments related to HBM as rated by the authors

| Participant | Susceptibility | Severity | Barriers | Benefits | Cues to action | Self efficacy |
|-------------|----------------|----------|----------|----------|----------------|---------------|
| 1           | +/n            | +        | -        | +        | N/A            | +             |
| 2           | -              | +        | n        | +/n      | N/A            | +             |
| 3           | -              | n        | -        | +        | N/A            | +             |
| 4           | +              | +        | -/n      | +        | N/A            | +             |
| 5           | +              | +        | -/n      | +        | N/A            | +             |
| 6           | -              | +        | -/n      | +        | N/A            | +             |
| 7           | -              | -        | +        | +        | N/A            | +             |
| 8           | -              | +        | -/n      | +        | N/A            | +             |
| 9           | -              | +        | -/n      | +        | N/A            | +             |
| 10          | -              | +        | -        | +        | N/A            | +             |
| 11          | -              | +        | n        | +        | N/A            | +             |
| 12          | +              | +        | -        | +        | N/A            | +             |
| 13          | -              | +        | -        | +        | N/A            | +             |
| 14          | -              | +        | -/n      | +        | N/A            | +             |
| 15          | N/A            | n        | -/n      | +        | N/A            | +             |
| 16          | -              | +        | -        | +        | N/A            | +             |
| 17          | -              | +        | -        | n        | N/A            | +             |
| 18          | -              | +        | -        | +        | N/A            | +             |
| 19          | +              | +        | +        | +        | N/A            | +             |
| 20          | -              | n        | -        | +        | N/A            | +             |

Notes: + indicates high, - indicates low, n indicates medium
